# Supplementary material
Source: MDPI journal article supplement (https://www.mdpi.com/2673-4605/4/1/32)
Supplement: s1 [file s1]

# Nanoconjugates based on cisplatin and single-walled carbon nanotubes for therapy of triple negative breast cancer

Madalina Andreea Badea<sup>1\*</sup>, Mihaela Balas<sup>1</sup>, Florentina Gina Cojocaru<sup>2</sup>, Daniela Ionita<sup>3</sup>, Anca Dinischiotu<sup>1</sup>

<sup>1</sup>University of Bucharest, Faculty of Biology, Department of Biochemistry and Molecular Biology, 91-95 Splaiul Independentei, R-050095, Bucharest, Romania.

<sup>2</sup>University of Bucharest, Faculty of Biology, Department of Anatomy, Physiology and Biophysics, 91-95 Splaiul Independentei, R-050095, Bucharest, Romania.

<sup>3</sup>Politehnica University of Bucharest, Faculty of Applied Chemistry and Materials Science, Department of General Chemistry, 313 Splaiul Independentei, 060042, Bucharest, Romania.

\*Corresponding author: madalina.andreea.badea@drd.unibuc.ro

**Keywords:** breast cancer; carbon nanotubes; cisplatin; apoptosis

## Background and aim of the study

**Background:** Triple negative breast cancer has a phenotype characterized by the absence of progesterone and estrogen receptors and lack of HER2 overexpression (1). In order to find new strategies for treatment, single-walled carbon nanotubes (SWCNT) in combination with chemotherapeutics were studied and tested as new therapeutic tools (2).

**Aim:** The objective of this study was to evaluate the efficiency of SWCNT in the transport of cisplatin (CDDP) for improving its cytotoxic effects on MDA-MB-231 cells.

## Materials and cells treatment

The nanoconjugates SWCNT-COOH-CDDP were obtained by functionalization of SWCNT with carboxyl groups (SWCNT-COOH) and conjugation with CDDP.

MDA-MB-231 cell line (triple negative breast cancer cells) was cultured in Dulbecco's Modified Eagle's Medium.

MDA-MB-231 cells were exposed to different doses of SWCNT-COOH, SWCNT-COOH-CDDP (0.01 – 2 µg/mL) and CDDP (0.00632 – 1.26 µg/mL) for 24 and 48 h.

## Methods

Spectrophotometric and fluorescence methods were performed for the evaluation of cellular viability (MTT test), reduced glutathione content (GSH) and determination of reactive oxygen species (ROS) production.

Immunoblotting was performed for the assessment of Nrf2, caspase-3, caspase-8 and Bid proteins expressions.

Wound healing assay was performed for the evaluation of the effects of SWCNT-COOH-CDDP on cell migration.

## Results and discussion

### Cellular viability

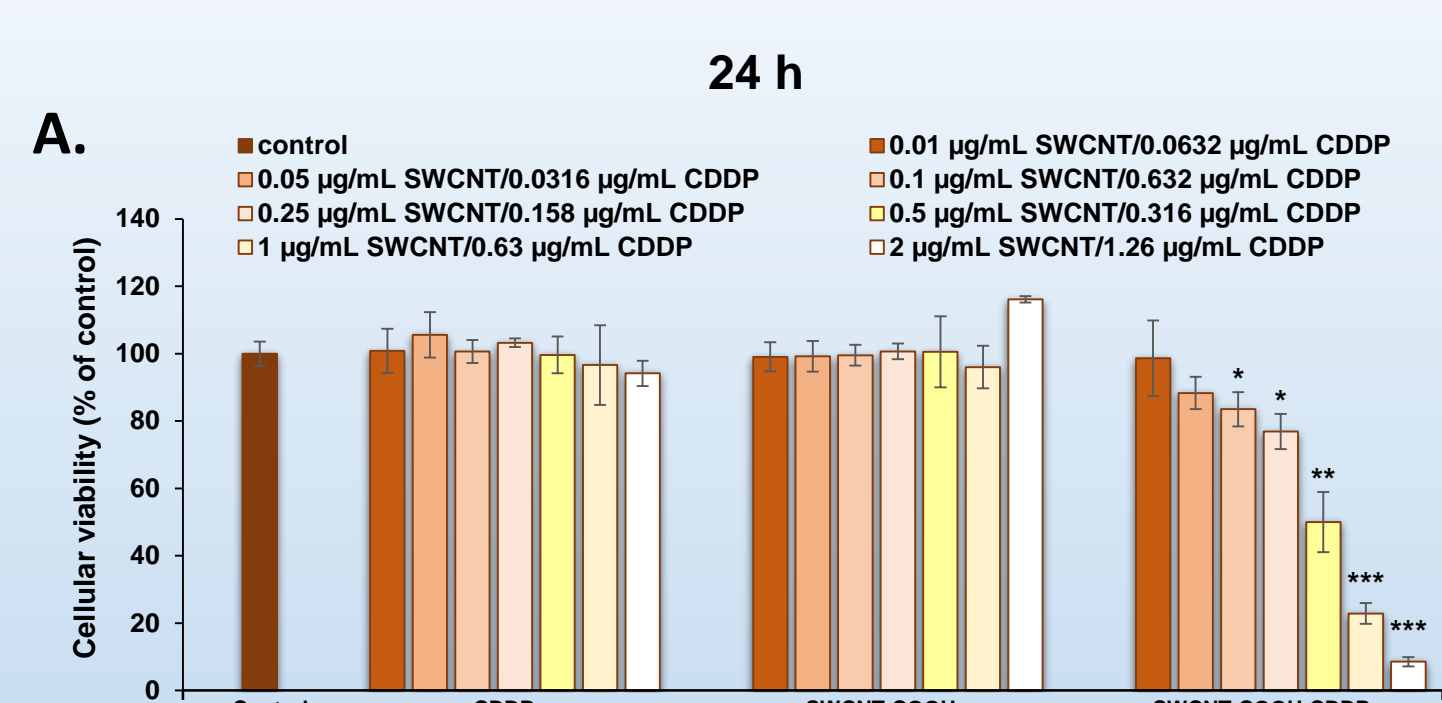

The cellular viability decreased in a time and dose-dependent manner in the presence of nanoconjugates relative to control.

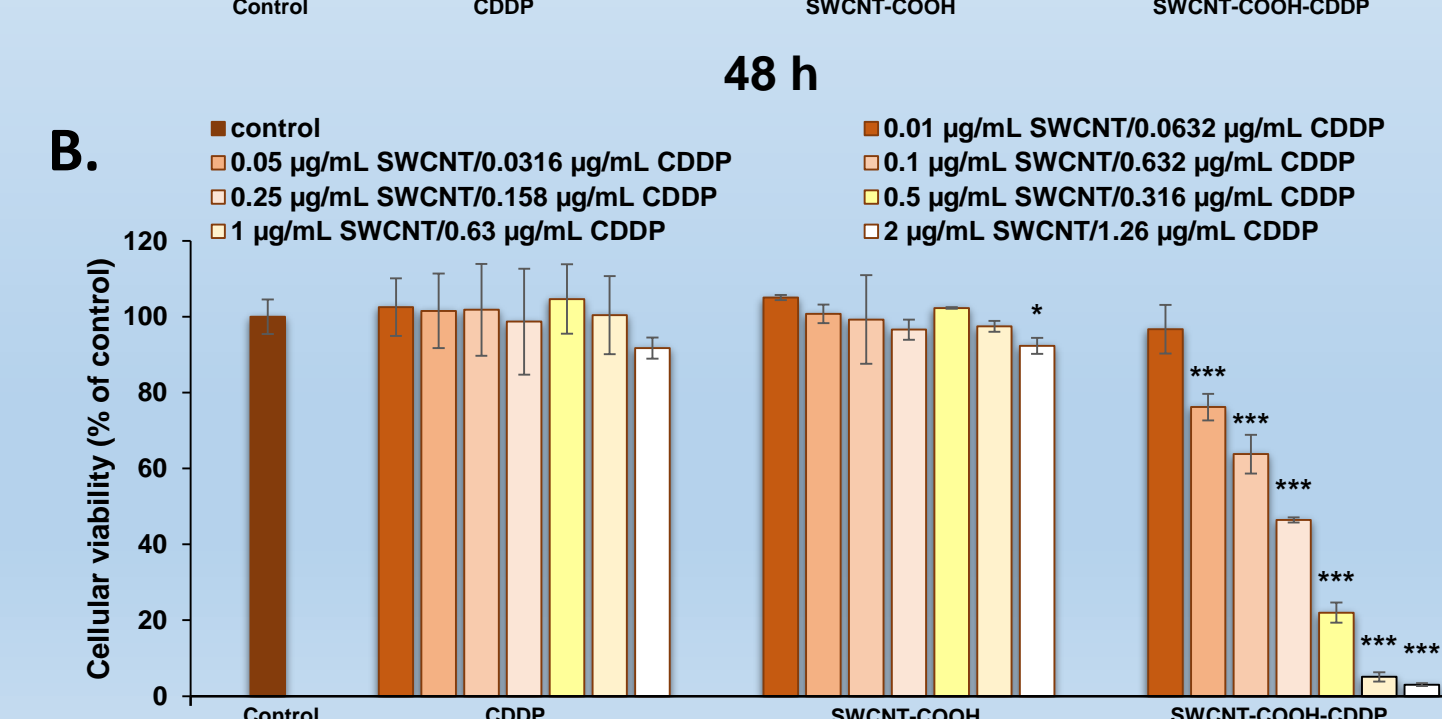

Cell viability after (A) 24 and (B) 48 h of exposure to SWCNT-COOH, SWCNT-COOH-CDDP (0.01 – 2 µg/mL) and CDDP (0.00632 – 1.26 µg/mL). \* p < 0.05, \*\* p < 0.01, \*\*\* p < 0.001 vs. control.

### Cell death

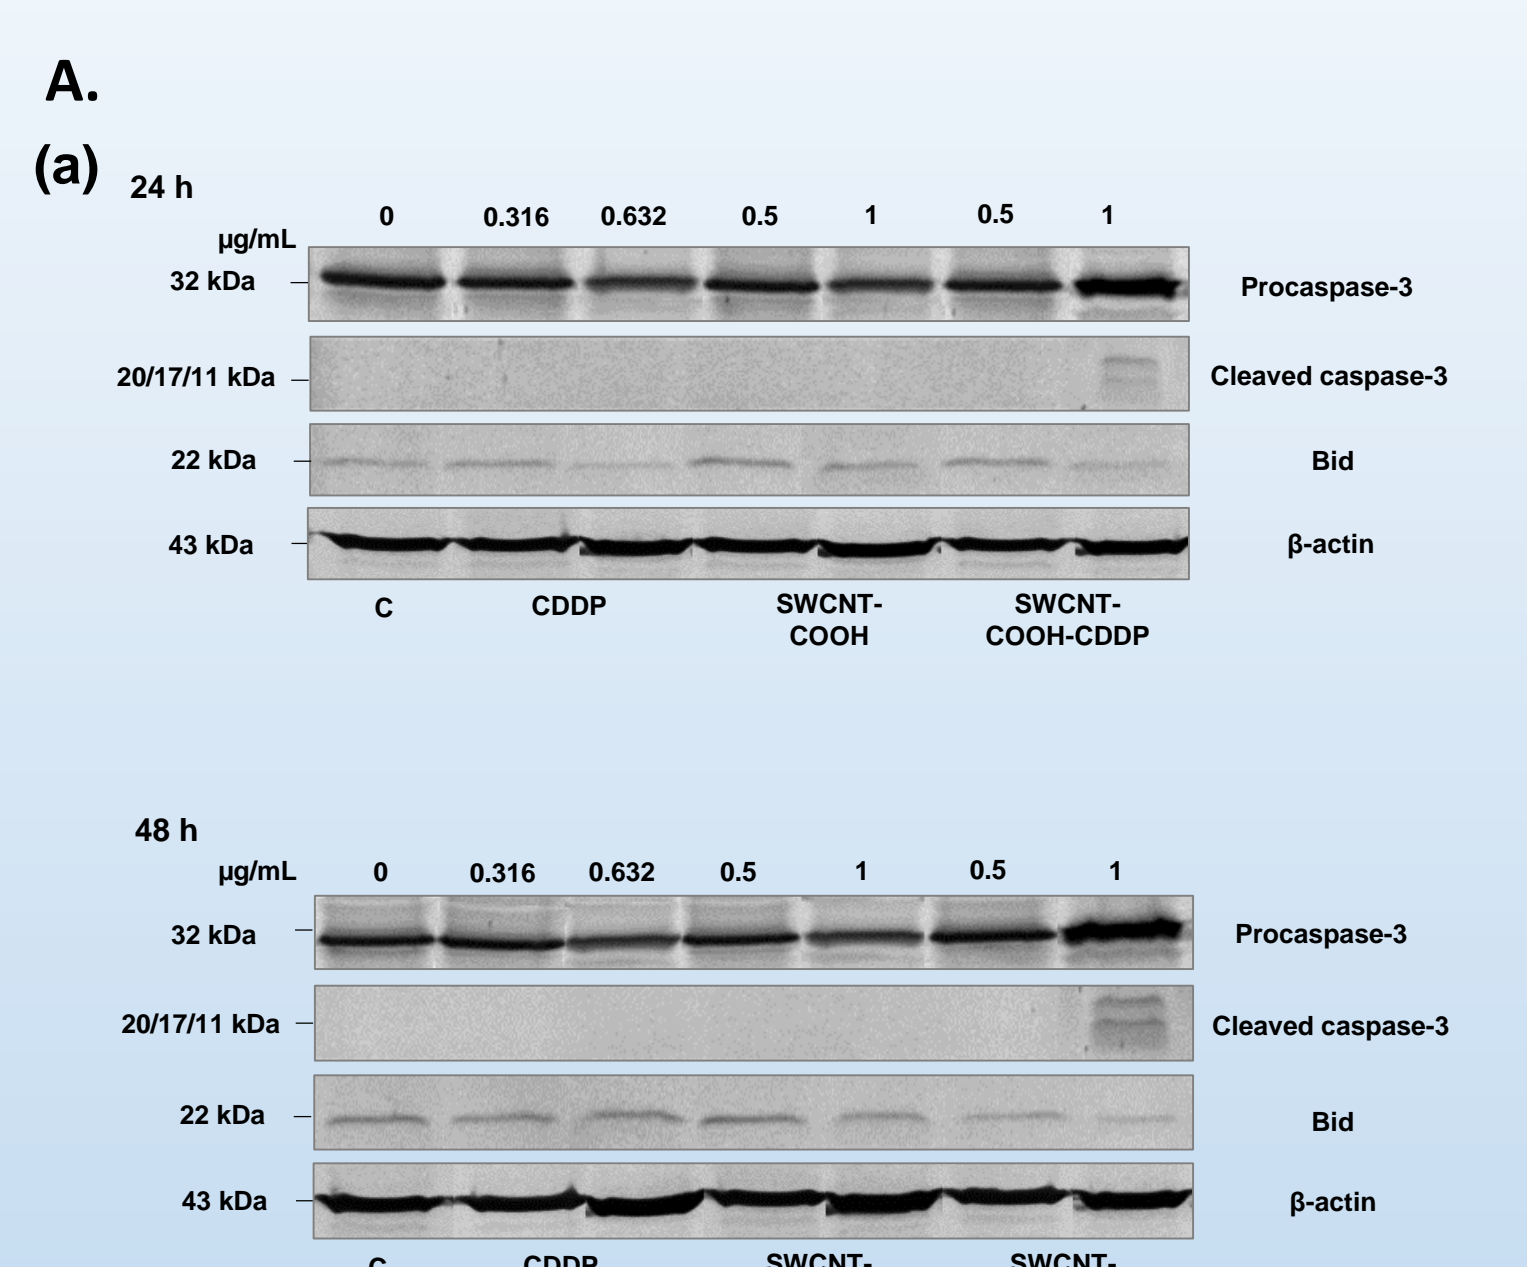

A. Relative protein expression of (b) procaspase-3/caspase-3 and (c) Bid proteins after 24 and 48 h of exposure to 0.5, 1 µg/mL SWCNT-COOH and SWCNT-COOH-CDDP, 0.316, 0.632 µg/mL CDDP, respectively. In figure (b), the lower graph presents a magnified image of the scale range between 0–250 from the upper graph. \* p < 0.05, \*\* p < 0.01, \*\*\* p < 0.001 vs. control.

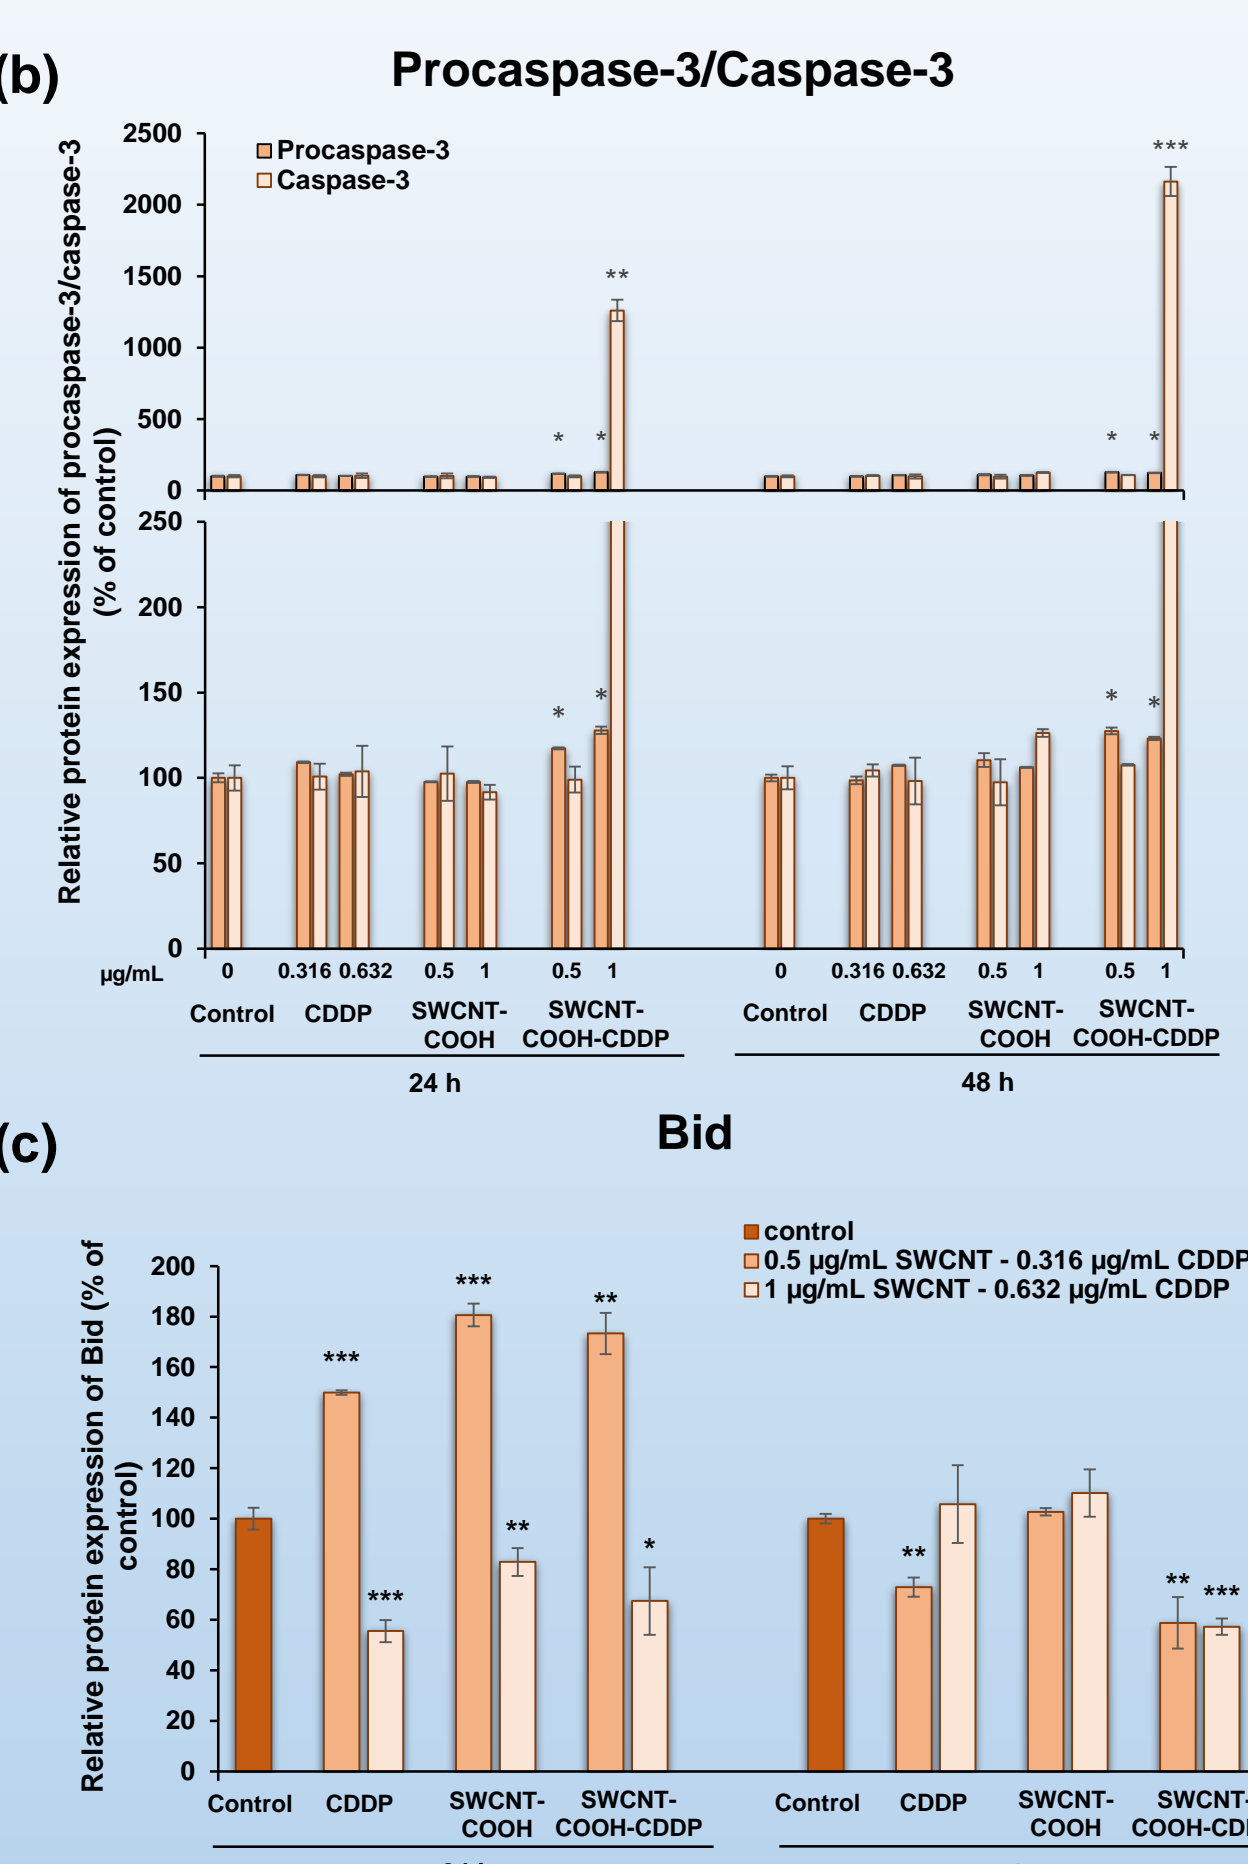

Caspase-3 and caspase-8 were activated in the presence of 1 µg/mL SWCNT-COOH-CDDP starting with 24 h of treatment.

An increase of procaspase-3 protein expression was observed after 24 h of incubation with nanoconjugates, followed by a downregulation at 48 h. A dose with 1 µg/mL SWCNT-COOH-CDDP induced downregulation of Bid protein expression at both intervals tested.

### Oxidative stress

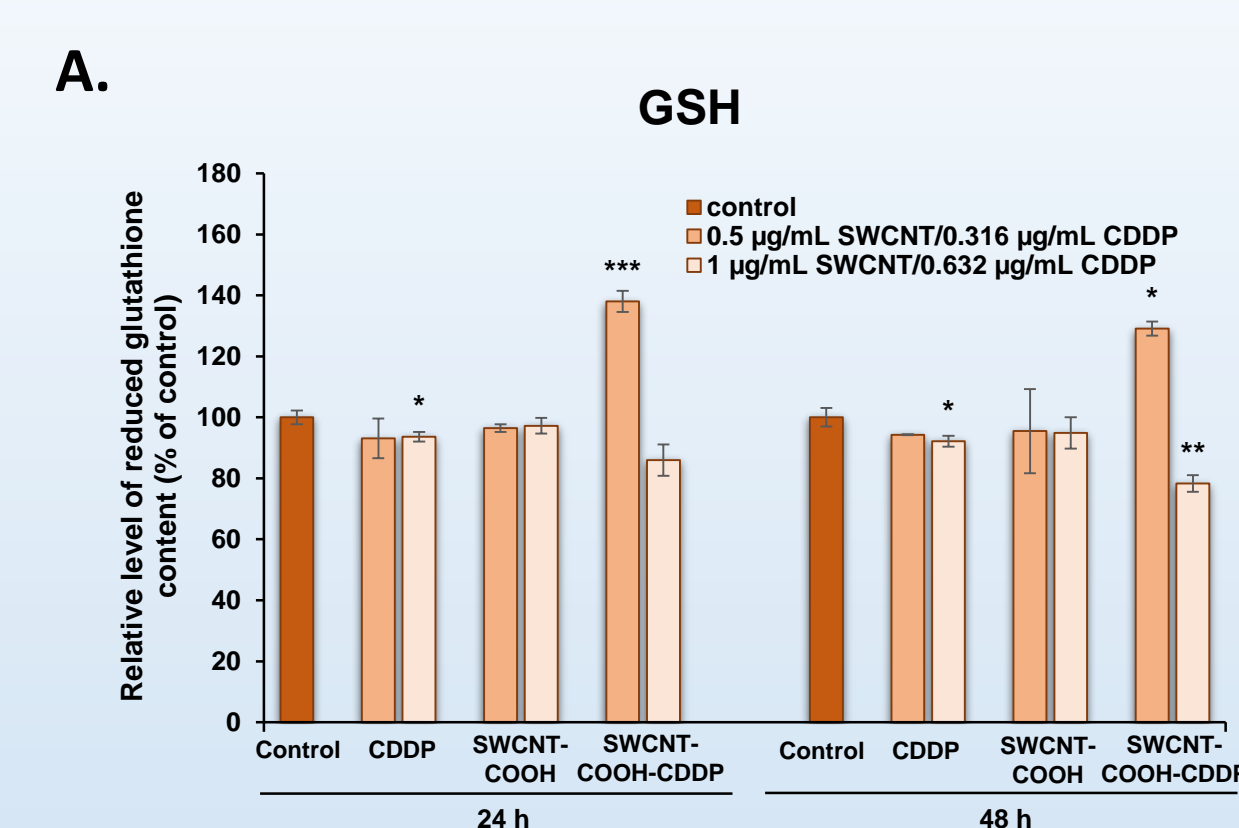

The level of GSH raised after 24 and 48 h of exposure to 0.5 µg/mL SWCNT-COOH-CDDP, while a decrease until 78.31% was recorded after 48 h in the presence of 1 µg/mL nanoconjugates.

The expression of Nrf2 decreased until 33% after 24 h of treatment with 1 µg/mL SWCNT-COOH-CDDP and increased until 80% compared to control (100%) after 48 h.

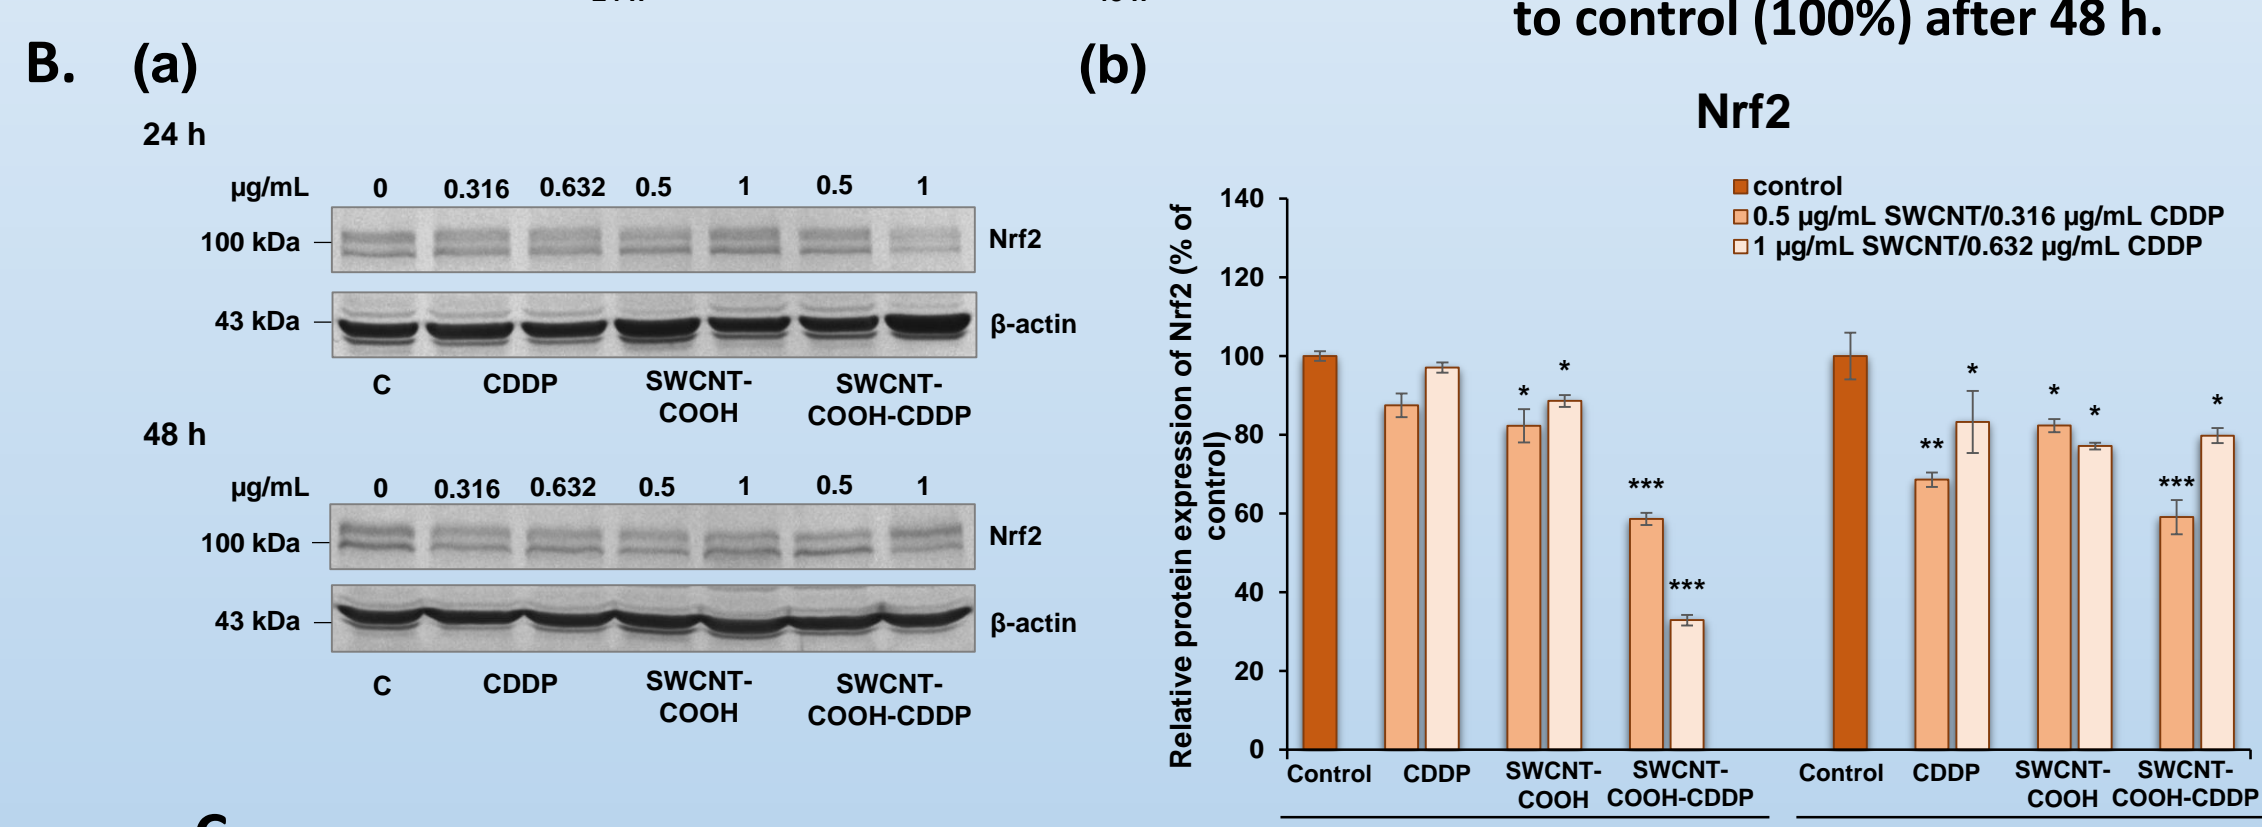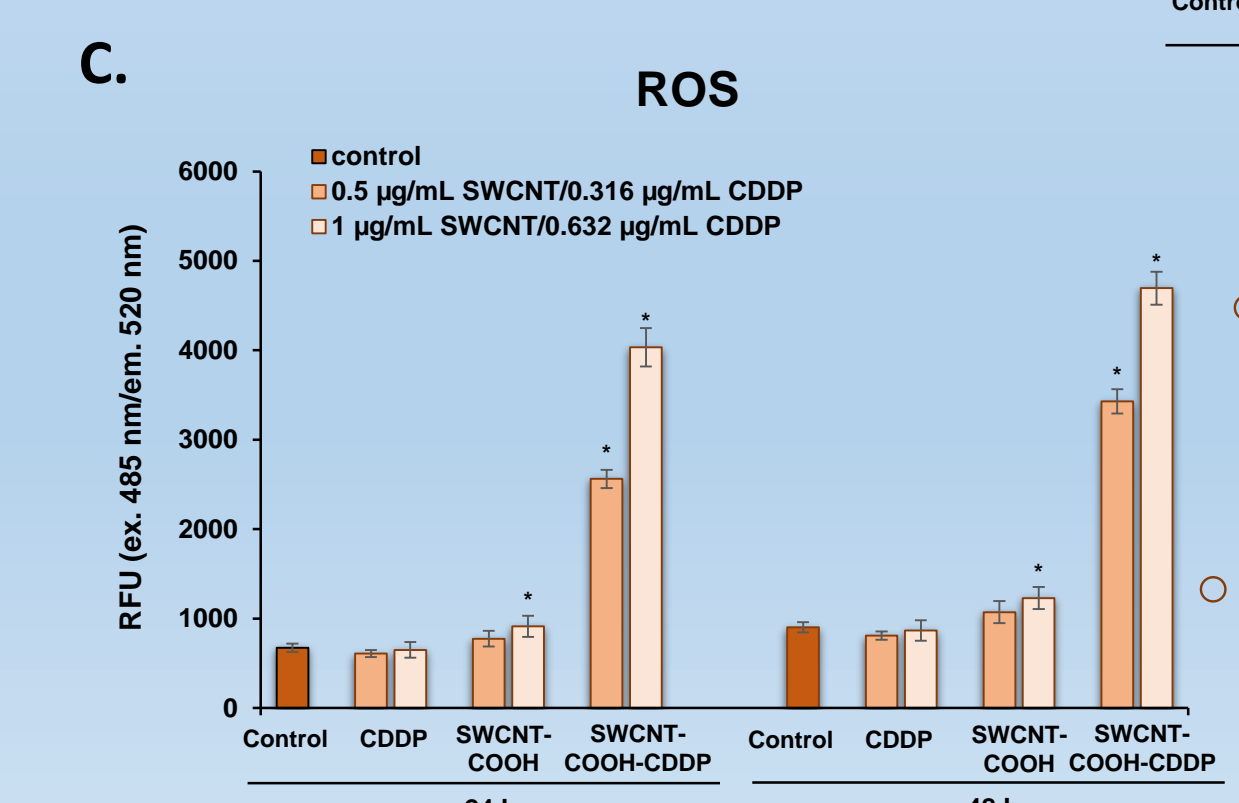

ROS level increased in a time and dose-dependent manner in the presence of nanoconjugates relative to control.

A slight increase was registered also for 1 µg/mL SWCNT-COOH after 24 and 48 h of incubation.

### Cell migration

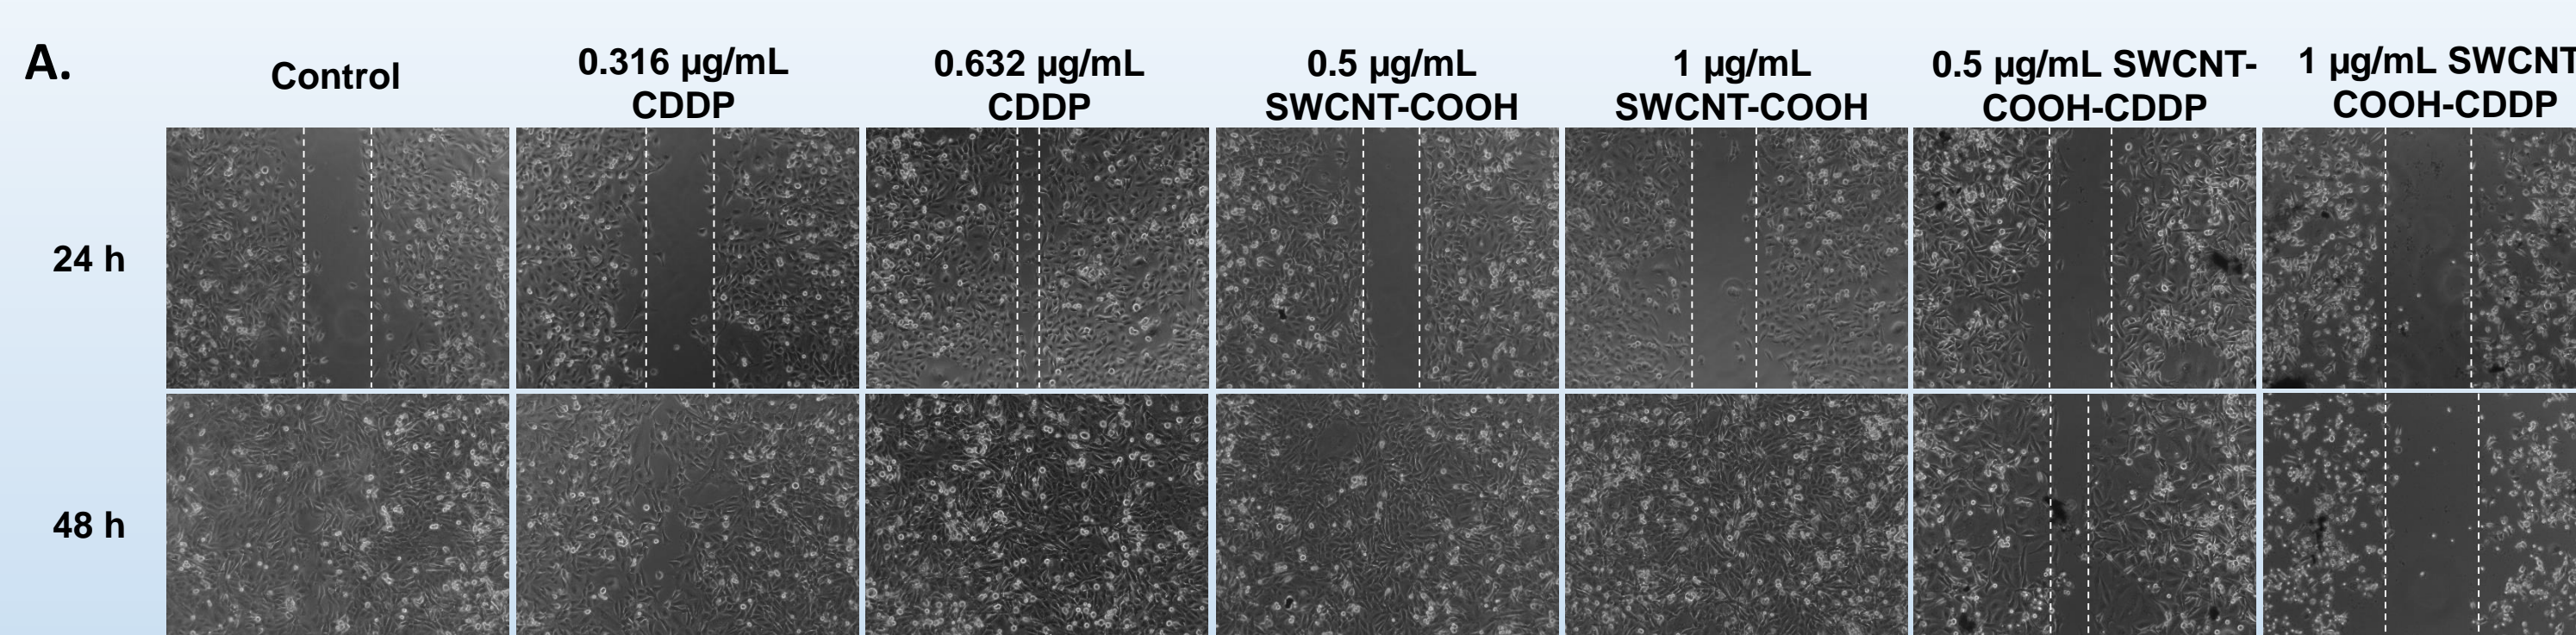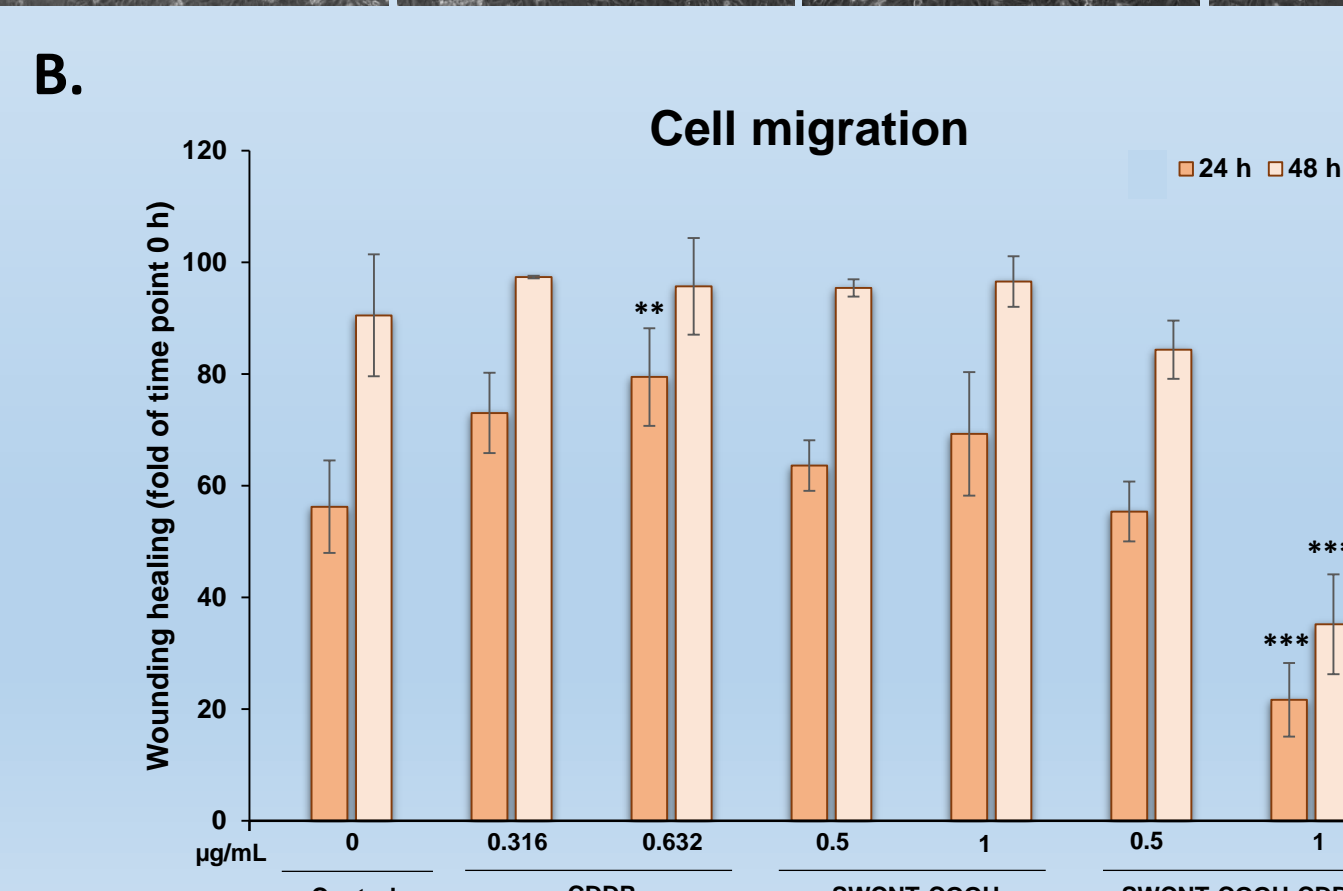

The inhibition of the cell migration was observed after 24 and 48 h of exposure with 1 µg/mL SWCNT-COOH-CDDP.

A dose of 0.632 µg/mL increased the migration capacity of MDA-MB-231 after 24 h of treatment.

Cell migration (scratch wound healing assay). (A) Bright-field images presenting the MDA-MB-231 cell culture after 24 and 48 h of wounding and incubation with 0.5, 1 µg/mL SWCNT-COOH and SWCNT-COOH-CDDP, 0.316, 0.632 µg/mL CDDP, respectively. (B) Quantification of presented images.

**Conclusions:** these nanoconjugates induced apoptosis in MDA-MB-231 cells, probably by both intrinsic and extrinsic pathways, by triggering the oxidative stress mechanisms, and inhibited their migration potential.
